# Supplementary material for: Gray Matter Abnormalities in Childhood Maltreatment: A Voxel-Wise Meta-Analysis
Source: Atypon-hosted journal article supplement (doi:10.1176/appi.ajp.2014.13101427), 2014-04-29
Supplement: 854_ds001.pdf [file 854_ds001.pdf]

**TABLE S1. Results of the Subgroup and Jackknife Sensitivity Analyses<sup>a</sup>**

| Brain Region                                           | Studies Using Unmedicated Participants (N=8) | Jackknife Analysis: Excluded Study |          |          |           |           |           |          |          |          |          |          |          |          |
|--------------------------------------------------------|----------------------------------------------|------------------------------------|----------|----------|-----------|-----------|-----------|----------|----------|----------|----------|----------|----------|----------|
|                                                        |                                              | Summary                            | Car 2009 | DeB 2013 | Liao 2013 | Tom 2009a | Tom 2009b | Har 2010 | Lan 2010 | Tho 2010 | Tom 2010 | Tom 2012 | Cha 2013 | She 2013 |
| <b>Childhood maltreatment &lt; comparison subjects</b> |                                              |                                    |          |          |           |           |           |          |          |          |          |          |          |          |
| Right orbitofrontal/superior temporal gyrus            | Yes                                          | 12/12                              | Yes      | Yes      | Yes       | Yes       | Yes       | Yes      | Yes      | Yes      | Yes      | Yes      | Yes      | Yes      |
| Left inferior frontal gyrus                            | Yes                                          | 10/12                              | Yes      | No       | Yes       | Yes       | Yes       | Yes      | Yes      | Yes      | Yes      | Yes      | Yes      | No       |
| Left postcentral gyrus                                 | No                                           | 11/12                              | Yes      | Yes      | Yes       | Yes       | Yes       | Yes      | Yes      | Yes      | Yes      | Yes      | No       | Yes      |
| Right middle temporal gyrus                            | Yes                                          | 10/12                              | Yes      | No       | Yes       | Yes       | Yes       | Yes      | Yes      | Yes      | Yes      | Yes      | Yes      | No       |
| <b>Childhood maltreatment &gt; comparison subjects</b> |                                              |                                    |          |          |           |           |           |          |          |          |          |          |          |          |
| Right superior frontal gyrus                           | No                                           | 11/12                              | Yes      | Yes      | Yes       | Yes       | Yes       | Yes      | Yes      | Yes      | Yes      | Yes      | No       | Yes      |
| Left middle occipital gyrus                            | No                                           | 11/12                              | Yes      | Yes      | Yes       | Yes       | Yes       | Yes      | Yes      | Yes      | Yes      | Yes      | No       | Yes      |

<sup>a</sup> “Yes” indicates that the brain region remains significantly different in the subgroup/jackknife analysis; “No” indicates that the brain region is no longer significantly different in the subgroup/jackknife analysis. Car 2009=Carrion et al., 2009; De B 2013=De Brito et al., 2013; Liao 2013=Liao et al., 2013; Tom 2009a=Tomoda et al., 2009a; Tom 2009b=Tomoda et al., 2009b; Har 2010=Harmelen et al., 2010; Lan 2010=Landre et al., 2010; Tho 2010=Thomaes et al., 2010; Tom 2010= Tomoda et al., 2010; Tom 2012=Tomoda et al., 2012; Cha 2013=Chaney et al., 2013; She 2013=Sheffield et al., 2013
